# Supplementary material for: Layer-by-layer growth in solution deposition of monocrystalline lead sulfide thin films on GaAs(111)
Source: Royal Society of Chemistry journal article supplement (doi:10.1039/c9qm00155g), 2019-01-01
Supplement: c9qm00155g1.pdf [file c9qm00155g1.pdf]

## Supporting Information

### Layer-By-Layer Growth in Solution Deposition of Monocrystalline

### Lead Sulfide Thin Films on GaAs(111)

Tzvi Templeman<sup>1</sup>, Maayan Perez<sup>1</sup>, Ofir Friedman<sup>1</sup>, Ran Eitan Abutbul<sup>1</sup>, Michael

Shandalov<sup>2</sup>, Vladimir Ezersky<sup>1</sup>, Oleg Konovalov<sup>3</sup> and Yuval Golan<sup>1\*</sup>

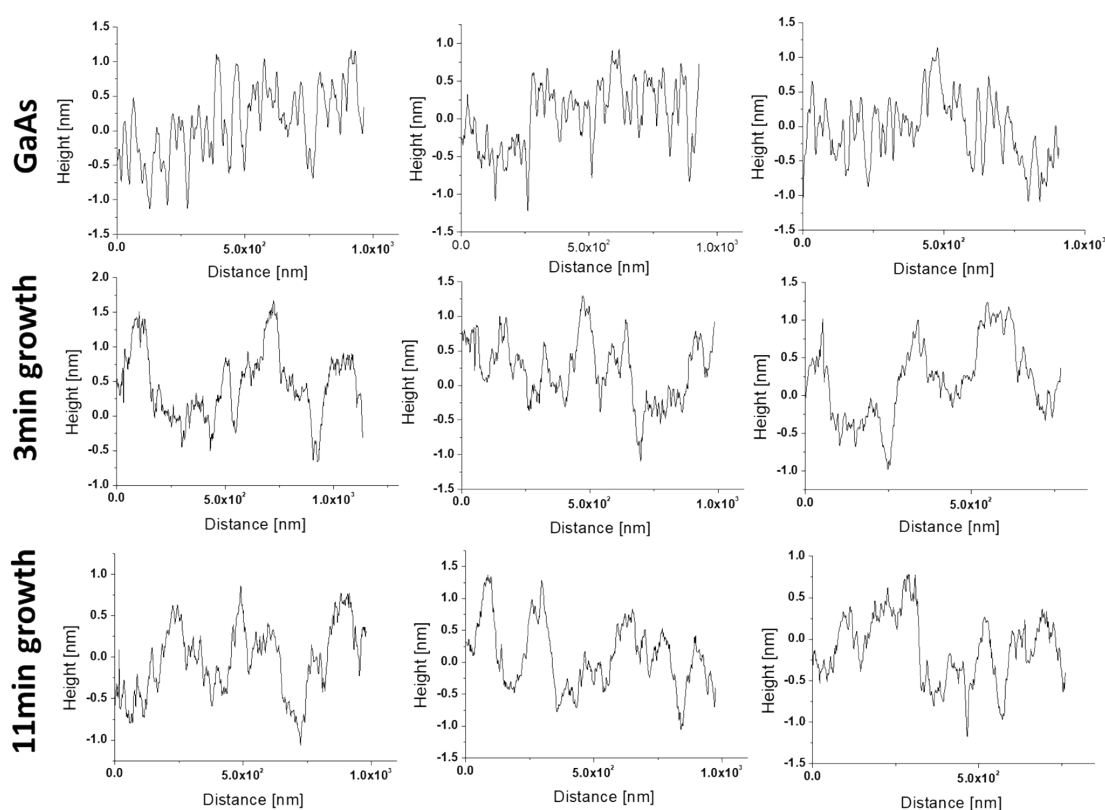

Supplementary Figure 1. **AFM surface topography images:** Typical AFM line profiles taken in air from the following samples: **(top row)** epi ready GaAs(111) wafer, **(second row)** PbS, 3 min growth duration and **(third row)** PbS, 11 min growth duration.

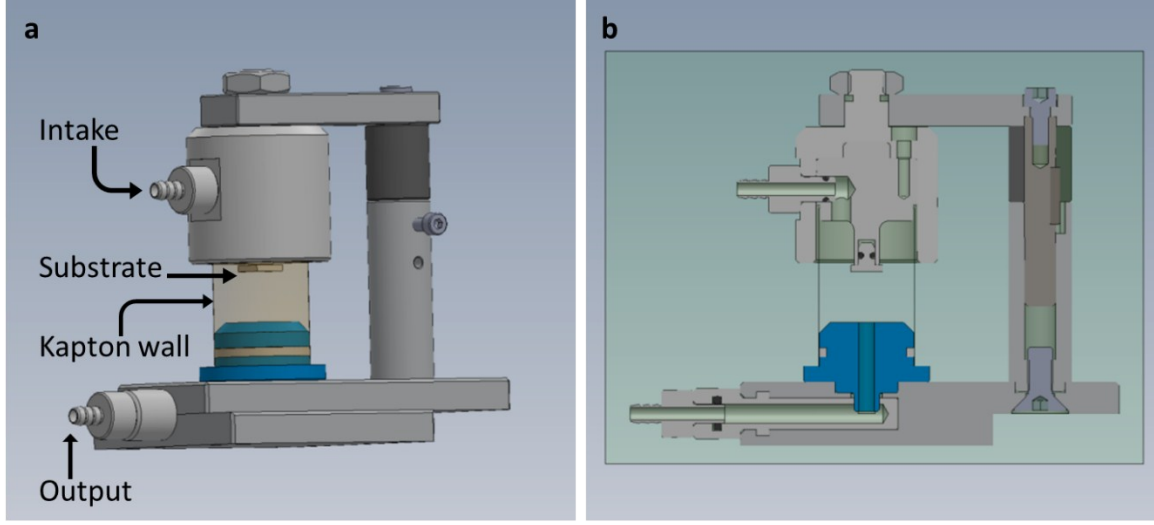

Supplementary Figure 2. **Schematic illustrations of the custom-built fluid cell used for *in-situ* GIXD characterization at ESRF ID-10.** (a) Cell overview and (b) Cell section.

### Scattering model for VW (3D) growth

In the model of polycrystalline nucleation and growth, the film thickness  $t$  is composed of an assembly of  $M$  small single crystals having  $N$  repetition of  $d_{(111)}$  arranged along  $z$  direction:

$$(1) \quad t = N \cdot d_{(111)} \cdot M$$

Scattering intensity of individual crystals is proportional to  $N^2$ , as described in the main text, and the incoherent sum of scattering intensity from crystallites along the film thickness results in

$$(2) \quad I_{\Sigma} = \sum_{i=1}^M I = I_S \cdot N^2 \cdot M$$

From (2) one can conclude the linear dependency of the intensity vs. film thickness.

### Error calculations

Thickness:

Thickness is estimated from the formula

$$I = I_0 \exp(-z/\tau) \rightarrow z = \tau [\ln(I_0) - \ln(I)]$$

Intensity error

$$\Delta I = \sqrt{I}$$

Following the theory of errors

$$\Delta z = \sqrt{\left(\frac{\partial z}{\partial \tau} \Delta \tau\right)^2 + \left(\frac{\partial z}{\partial I_0} \Delta I_0\right)^2 + \left(\frac{\partial z}{\partial I} \Delta I\right)^2} = \sqrt{(\Delta \tau [\ln(I_0) - \ln(I)])^2 + \tau^2 \left(\frac{\Delta I_0}{I_0}\right)^2 + \tau^2 \left(\frac{\Delta I}{I}\right)^2}$$

With  $\frac{\Delta I}{I} \sim 3\%$  and  $\Delta \tau \rightarrow 0$

We can write  $\Delta z = \tau \cdot 0.03 \cdot \sqrt{2} \approx \tau \cdot 0.04$

Assuming  $\tau \sim 4 \text{ nm}$ , then  $\Delta z \approx 0.17 \text{ nm}$

Thus we can say that the minimum of  $\Delta z$  is  $0.2 \text{ nm}$

In-plane coherence length:

$$L_{xy} = 0.9 \frac{2\pi}{fwhm_{q_{xy}}}$$

$$\Delta L_{xy} = \sqrt{\left(\frac{\partial L_{xy}}{\partial fwhm_{q_{xy}}} \Delta fwhm_{q_{xy}}\right)^2} = \frac{L_{xy}}{fwhm_{q_{xy}}} \cdot \Delta fwhm_{q_{xy}}$$

Width error taken from measurement resolution,  $\Delta fwhm_{q_{xy}} = 1.1 \cdot 10^{-3} nm^{-1}$

resulting in a maximum value of  $\Delta L_{xy} \sim 5 \text{ nm}$

Similarly for d-spacing:

$$d = \frac{2\pi}{q}$$

$$\Delta d = \sqrt{\left(\frac{\partial d}{\partial q} \Delta q\right)^2} = \frac{d}{q} \cdot \Delta q \approx 4 \cdot 10^{-4} \text{ nm}$$

## Methods

### Materials and Chemicals

Sodium hydroxide (Gadot, AR), lead nitrate (Aldrich, analytical 99.99+%) and thiourea (Aldrich, ACS $\geq$ 99.0%) were used without further purification. Single crystal GaAs(111)A substrates were purchased from AXT (epi-polished, undoped,  $\pm 0.1^\circ$  miscut). The films were deposited from a solution with a final composition of 30 mM lead nitrate, 50mM thiourea and 1.2M sodium hydroxide at a final pH > 14. For ex-situ experiments, films were deposited in a thermostatic bath into which a 50 ml Pyrex beaker was placed. The beaker was equipped with a custom-built Teflon stage for mounting the substrates. The substrates were placed epi-side down in the solution, at an angle of ca.  $70^\circ$  with respect to the air–solution interface. The beaker was covered using a glass Petri dish. Under these conditions a linear growth regime is obtained up to a duration of 2hr after which saturation impedes continuous film growth. Note that several minutes after reaction initiation homogenous precipitation is observed within the beaker.

### Structural and Chemical Characterization

#### *X-Ray Diffraction (XRD)*

The crystallographic phase and texture of the films were studied by XRD. A Panalytical Empyrean diffractometer equipped with a PIXcel linear detector and monochromator on diffracted beam was used. Data were collected in the  $2\theta/\theta$  geometry using Cu K $\alpha$  radiation ( $\lambda = 0.15405$  nm) at 40 kV and 30 mA. Diffraction scans were taken during 8 minutes in a  $2\theta$  range of  $20$ – $65^\circ$  with a step size of  $\sim 0.033^\circ$ . Rocking curves were obtained using a parabolic X-ray mirror for Cu K $\alpha$  radiation installed on the incident beam, providing a quasi- parallel beam with divergence less than 0.05 of a degree.

### *Field Emission Gun Scanning Electron Microscopy (FEG-SEM)*

The morphology of the films was observed using an ultrahigh resolution JEOL JSM-7400F FEG-SEM without coating of the surface. Acceleration voltage was 3.5 kV and signal was collected using an in-lens secondary electron detector. Film thickness was measured from cleaved cross sections (X-sec) while surface topography was observed in plan-view.

### *Transmission Electron Microscopy (TEM)*

Cross sections were prepared by cutting the sample into slices normal to the interface and gluing them together face-to-face using M-Bond 610 adhesive (Allied HighTech Ltd.). The samples were polished with a precision small-angle tripod holder on a series of diamond polishing papers (Allied HighTech Ltd) until a nominal thickness of 30 $\mu$ m was achieved, and glued to a Mo slot grid (1 $\times$ 2 mm<sup>2</sup>). Final thinning was done by Ar ion milling using a Gatan PIPS-2 precision ion polishing system. TEM, HAADF STEM and HRTEM were carried out using a JEOL JEM-2100F instrument operating at 200kV.

### *Atomic Force Microscopy (AFM)*

Atomic force microscopy (AFM) measurements were performed in AC-mode with an MFP-3D AFM from Asylum Research (Oxford Instruments). Analyses were performed on 1X1  $\mu$ m<sup>2</sup> scans obtained at a scan rate of 1.5 Hz.

### *XPS*

An ESCALAB 250 spectrometer with a monochromatic Al X-ray source (excitation energy 1486.6 eV) at a base pressure of 1 $\times$ 10<sup>-9</sup> mbar was used for XPS measurements. Wide-scan survey spectrum for all elements and high-resolution spectra of selected elements were recorded.

### *GIXD Characterization*

X-ray scattering measurements were performed at ID10 beamline at the European Synchrotron Radiation Facility (ESRF, Grenoble, France), which is especially designed for studies of liquid-solid interfaces using GIXD. A beamstop was used for detector protection in the position of direct and specularly reflected beams. GIXD data were obtained using monochromatic X-rays with an energy of 22 keV. The 2D GIXD patterns were recorded with a Pilatus 300k detector (487x619 pixels with a pixel size  $172 \times 172 \mu\text{m}^2$ ) from Dectris (Baden, Switzerland) at a distance of 284 mm from the sample. The beam grazing angle was  $0.08^\circ$ , 80% of the GaAs critical angle ( $0.1^\circ$ ), and 67% of the PbS critical angle ( $0.12^\circ$ ). Phi scan rate was 0.02 [deg/sec].
